# Supplementary material for: Brain functions and cognition on transient insulin deprivation in type 1 diabetes
Source: PubMed Central journal article supplement (PMC8021100; doi:10.1172/jci.insight.144014), 2021-03-08
Supplement: jciinsight-6-144014-s275.pdf [file jciinsight-6-144014-s275.pdf]

## Supplement Table 1

### AVLT Components - Time 1 (T1) to Time 2 (T2) changes paired t-test

|                 |    | <b>Mean ± SEM<br/>Recog SS-<br/>AVLT</b> | <b>Mean ± SEM<br/>Trial 6 SS-<br/>AVLT</b> | <b>Mean ± SEM<br/>Total Trials<br/>1-5 SS-<br/>AVLT</b> | <b>Mean ± SEM<br/>Average of<br/>List B SS-<br/>AVLT</b> | <b>Mean ± SEM<br/>Delay Recall<br/>SS-AVLT</b> |
|-----------------|----|------------------------------------------|--------------------------------------------|---------------------------------------------------------|----------------------------------------------------------|------------------------------------------------|
| ND-Adult        | T1 | 104.6 ± 2.5                              | 99.6 ± 6.4                                 | 96.9 ± 5.4                                              | 93.6 ± 5.1                                               | 98.4 ± 5.8                                     |
|                 | T2 | 95.1 ± 7.4                               | 91.6 ± 6.4                                 | 84.9 ± 3.7*                                             | 92.6 ± 3.5                                               | 78.0 ± 8.7*                                    |
| ND-Adolescent   | T1 | 89.8 ± 6.8                               | 77.3 ± 6.2                                 | 78.5 ± 7.9                                              | 87.3 ± 4.2                                               | 73.1 ± 7.5                                     |
|                 | T2 | 72.5 ± 9.7                               | 61.3 ± 7.0*                                | 59.9 ± 7.3*                                             | 87.2 ± 4.3                                               | 47.3 ± 4.1*                                    |
| T1D-Adult       | T1 | 103.1 ± 4.0                              | 95.6 ± 6.5                                 | 92.7 ± 4.7                                              | 90.7 ± 6.5                                               | 95.2 ± 5.9                                     |
|                 | T2 | 87.7 ± 6.5*                              | 94.3 ± 6.5                                 | 91.1 ± 5.9                                              | 99.7 ± 5.0                                               | 81.1 ± 8.6*                                    |
| T1D- Adolescent | T1 | 91.9 ± 7.2                               | 77.7 ± 8.8                                 | 80.6 ± 7.7                                              | 93.2 ± 4.7                                               | 77.4 ± 10.6                                    |
|                 | T2 | 47.6 ± 16.7*                             | 64.0 ± 8.8                                 | 67.4 ± 9.3                                              | 93.4 ± 5.6                                               | 34.9 ± 4.6*                                    |

\*p<0.05

Note: There are variable responses in T1D and ND adults and adolescents related to the insulin deprivation and control period. As a result we did not pool the results of adults and adolescents as we have done in other cognitive measurements and reported in Figure 1A.
